# Supplementary material for: Crystalloid Liberal or Vasopressors Early Resuscitation in Sepsis-Study of Treatment’s Echocardiographic Mechanisms (CLOVERS-STEM)
Source: PubMed Central journal article supplement (PMC11631020; doi:10.1097/cce.0000000000001182), 2024-12-09
Supplement: cc9-6-e1182-s001.pdf [file cc9-6-e1182-s001.pdf]

Supplemental Table 1: Demographics, baseline characteristics, outcomes (n = 119). Reported as median (IQR) or n (%). No significant differences between groups.

| Attribute                                  | Liberal Fluids<br>n=64 | Restrictive Fluids<br>n=67 | All<br>n=131      |
|--------------------------------------------|------------------------|----------------------------|-------------------|
| <b>Demographics</b>                        |                        |                            |                   |
| Age, years                                 | 57.0 (49.0-67.2)       | 60.0 (43.0-67.0)           | 59.0 (48.0-67.5)  |
| Female Sex, n (%)                          | 26 (40.6%)             | 31 (46.3%)                 | 57 (43.5%)        |
| Race, n (%)                                |                        |                            |                   |
| Asian                                      | 3 (4.7%)               | 4 (6.0%)                   | 7 (5.3%)          |
| African American                           | 6 (9.4%)               | 11 (16.4%)                 | 17 (13%)          |
| White                                      | 47 (73.4%)             | 47 (70.1%)                 | 94 (71.8%)        |
| Unknown                                    | 8 (12.5%)              | 4 (6.0%)                   | 12 (9.2%)         |
| Ethnicity, n (%)                           |                        |                            |                   |
| Hispanic or Latino                         | 9 (14.1%)              | 8 (11.9%)                  | 17 (13.0%)        |
| Not Hispanic or Latino                     | 52 (81.2%)             | 55 (82.1%)                 | 107 (81.7%)       |
| Not reported                               | 3 (4.7%)               | 4 (4.6%)                   | 7 (5.3%)          |
| <b>Baseline</b>                            |                        |                            |                   |
| Charlson comorbidity index                 | 1 (0-3)                | 1 (0-3)                    | 1 (0-3)           |
| Body mass index                            | 26.5 (23.1-30.6)       | 25.9 (23.0-31.3)           | 26.3 (23.1-31.0)  |
| Chronic dialysis, n (%)                    | 5 (7.8%)               | 3 (4.5%)                   | 8 (6.1%)          |
| <b>Enrollment Vitals</b>                   |                        |                            |                   |
| Mean arterial pressure, mm Hg              | 66.0 (60.8-72.0)       | 65.0 (60.0-71.5)           | 65.5 (60.0-71.9)  |
| Heart rate, min <sup>-1</sup>              | 94.5 (72.8-108.0)      | 94.0 (78.5-106.5)          | 94.0 (77.0-108.0) |
| Atrial arrhythmia, n (%)                   | 4 (6.2%)               | 4 (6.0%)                   | 8 (6.1%)          |
| Ventricular arrhythmia, n (%)              | 1 (1.6%)               | 0 (0%)                     | 1 (0.8%)          |
| Respiratory rate, min <sup>-1</sup>        | 19.0 (16.0-22.0)       | 18.0 (16.0-23.5)           | 19.0 (16.0-22.5)  |
| Temperature, °C                            | 36.9 (36.6-37.4)       | 37.0 (36.6-38.0)           | 37.0 (36.6-37.6)  |
| Acute respiratory distress syndrome, n (%) | 0 (0%)                 | 1 (1.5%)                   | 1 (0.8%)          |
| SOFA                                       | 3 (1-5)                | 3 (1-6)                    | 3 (1-5)           |
| Troponin                                   | 0.02 (0.00-0.05)       | 0.02 (0.00-0.09)           | 0.02 (0.00-0.07)  |
| <b>Enrollment Treatments</b>               |                        |                            |                   |
| Intensive care unit, n (%)                 | 36 (56.2%)             | 47 (70.1%)                 | 83 (63.4%)        |
| Mechanical ventilation, n (%)              | 11 (17.2%)             | 15 (22.4%)                 | 26 (19.8%)        |
| Vasopressors at enrollment, n (%)          |                        |                            |                   |
| Norepinephrine, n (%)                      | 13 (20.3%)             | 14 (20.9%)                 | 27 (20.6%)        |
| Vasopressin, n (%)                         | 11 (17.2%)             | 14 (20.9%)                 | 25 (19.1%)        |
| <b>Total fluids prior to randomization</b> |                        |                            |                   |
| Normal saline                              | 2050 (1292-2354)       | 2011 (1283-2377)           | 2050 (1285-2355)  |
| Lactated Ringers                           | 0 (0-625)              | 0 (0-1000)                 | 0 (0-1000)        |
| Plasmalyte                                 | 1000 (950-2000)        | 1000 (0-2000)              | 1000 (0-2000)     |

|                                     |                |                  |                 |
|-------------------------------------|----------------|------------------|-----------------|
| Blood products                      | 238 (98-361)   | 181 (50-300)     | 206 (51-348)    |
| <b>Outcomes</b>                     |                |                  |                 |
| Acute respiratory distress syndrome | 1 (1.6%)       | 2 (3.0%)         | 3 (2.3%)        |
| Discharged before day 3, n (%)      | 8 (12.5%)      | 10 (14.9%)       | 18 (13.7%)      |
| Mortality before day 3, n (%)       | 1 (1.6%)       | 1 (1.5%)         | 2 (1.5%)        |
| Day 3 SOFA                          | 1.0 (0.0-3.8)  | 1.0 (0.0-4.0)    | 1.0 (0.0-4.0)   |
| Day 3 ΔSOFA                         | 1.0 (0.0-3.0)  | 1.0 (0.0-2.5)    | 1.0 (0.0-3.0)   |
| Mortality - in hospital, n (%)      | 10 (15.6%)     | 8 (11.9%)        | 18 (13.7%)      |
| Mortality - 90 days, n (%)          | 14 (21.9%)     | 16 (23.9%)       | 30 (22.9%)      |
| Time to mortality, days             | 8.5 (4.5-18.0) | 29.5 (11.0-50.0) | 14.5 (5.2-39.8) |

Supplemental Table 2: Echocardiographic data. Reported as median (IQR). No significant differences between groups.

| Attribute                          | Liberal Fluids<br>n=64 | Restrictive Fluids<br>n=67 | All<br>n=131        |
|------------------------------------|------------------------|----------------------------|---------------------|
| <b>Baseline Echo Data (N= 79)</b>  |                        |                            |                     |
| LV EF, %                           | 59.4 (53.6-66.8)       | 60.8 (55.8-67.6)           | 60.3 (54.8-67.4)    |
| Left ventricular GLS, %            | -19.1 (-22.5--13.9)    | -16.2 (-20.2--12.8)        | -17.3 (-21.4--13.1) |
| E/e'                               | 7.7 (6.3-11.9)         | 7.6 (6.6-10.6)             | 7.6 (6.5-10.9)      |
| RV FAC, %                          | 35.4 (24.9-41.2)       | 35.6 (32.4-42.9)           | 35.5 (29.1-42.9)    |
| RV TAPSE, cm                       | 1.9 (1.6-2.2)          | 2.1 (1.8-2.3)              | 2.0 (1.6-2.3)       |
| Right Ventricular Free Wall GLS, % | -18.2 (-21.9--12.0)    | -17.7 (-21.5--10.0)        | -18.2 (-21.6--10.9) |
| <b>24-hour Echo Data</b>           |                        |                            |                     |
| LV EF, %                           | 58.4 (53.5-64.8)       | 60.3 (54.8-69.7)           | 59.7 (54.4-67.2)    |
| Left ventricular GLS, %            | -17.8 (-21.4--14.5)    | -17.6 (-19.9--13.7)        | -17.8 (-20.6--14.4) |
| ΔLeft ventricular GLS, %           | 0.4 (-4.3-2.2)         | 1.4 (-2.5-3.9)             | 0.6 (-3.5-3.4)      |
| E/e'                               | 8.2 (6.9-11.6)         | 7.6 (6.7-10.4)             | 8.0 (6.7-11.2)      |
| RV FAC, %                          | 39.8 (26.0-46.5)       | 32.4 (26.4-41.2)           | 36.1 (25.9-43.1)    |
| RV TAPSE, cm                       | -19.8 (-26.2--15.3)    | -19.6 (-24.6--12.7)        | -19.7 (-25.3--14.2) |
| Right Ventricular Free Wall GLS, % | -19.8 (-26.2--15.3)    | -19.6 (-24.6--12.7)        | -19.7 (-25.3--14.2) |

Supplemental Table 3: Fluid and vasopressor receipt between treatment arms. Echocardiographic data. Reported as median (IQR). No significant differences between groups.

| Attribute                                | Liberal Fluids<br>n=64 | Restrictive Fluids<br>n=67 | All<br>n=131    | P value |
|------------------------------------------|------------------------|----------------------------|-----------------|---------|
| Vasopressor receipt 0 to 24 hours, n (%) | 23 (35.9%)             | 41 (61.2%)                 | 64 (48.9%)      | 0.007   |
| Vasopressor receipt 48h to day 28, n (%) | 35 (20.3%)             | 24 (13.7%)                 | 59 (17%)        | 0.046   |
| Received 2L per protocol, n (%)          | 38 (59.4%)             | 0 (0%)                     | 38 (29.0%)      | <0.001  |
| IV Fluid first 6 Hours, mL               | 2150 (1650-2525)       | 598 (202-1140)             | 1250 (550-2226) | <0.001  |
| IV Fluid first 6 Hours, mL/kg            | 27.3 (20.6-37.0)       | 6.0 (2.6-14.2)             | 16.7 (5.2-29.2) | <0.001  |
| Total volume 6-24 hours                  | 0 (0-2000)             | 0 (0-138)                  | 0 (0-750)       | 0.436   |
